# Supplementary material
Source: PubMed Central journal article supplement (PMC4744885)
Supplement: Supp_Figure2.pdf [file Supp_Figure2.pdf]

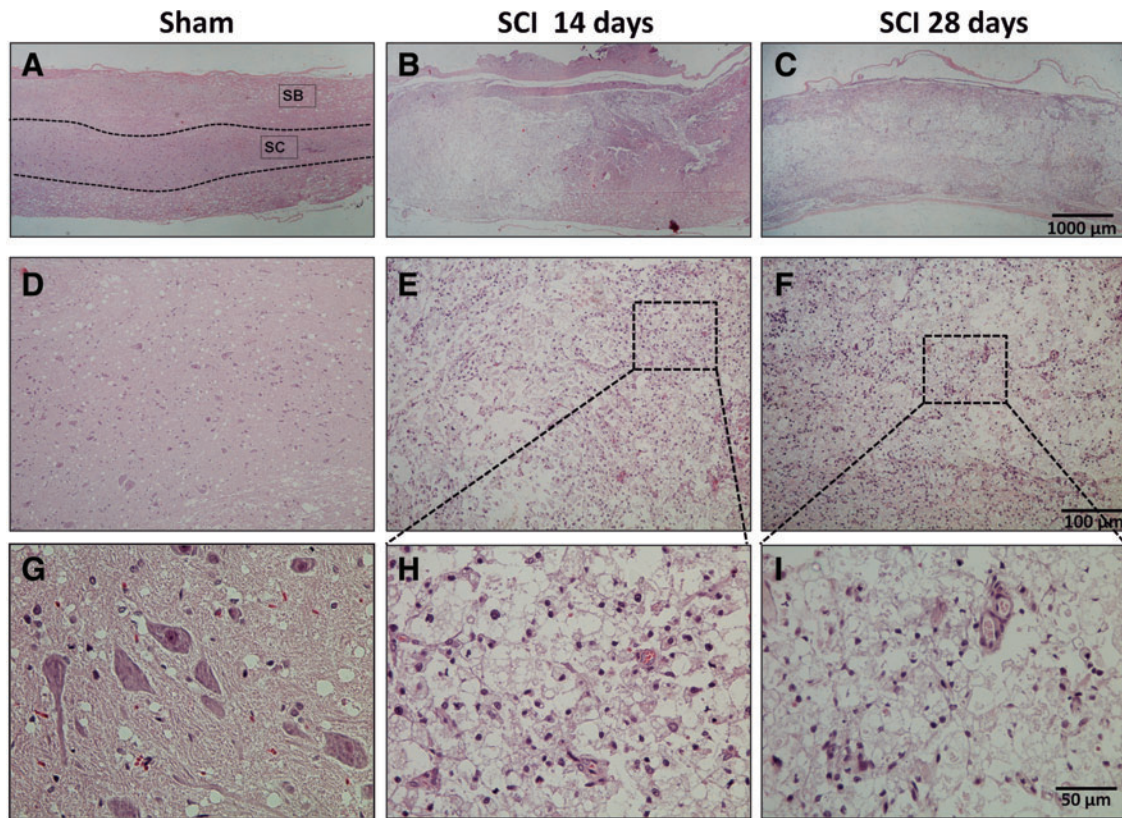

**SUPPLEMENTARY FIG. 2.** Spinal cord histological analysis of animals submitted to chronic SCI. Spinal cord longitudinal sections were stained with hematoxylin and eosin (H&E). (A) Representative image of spinal cord of sham-operated group; the gray matter is delimited by the dashed lines and is surrounded by white matter. (D and G) Magnified images of the gray matter clear of histological alterations. (B and C) Representative image of SCI animals assessed 14 days (B) or 28 days (C) after surgery. (E and F) Clear areas within the injured gray matter are observed. (H and I) Magnified images of areas highlighted in E and F, where it is possible to observe balloon cells, which are histological compatible with degraded neuronal cells. SCI, spinal cord injury. (A–C original magnification 20×; D–F original magnification 100×; G–I original magnification 400×.)
