# Supplementary material
Source: PubMed Central journal article supplement (PMC4744885)
Supplement: Supp_Figure3.pdf [file Supp_Figure3.pdf]

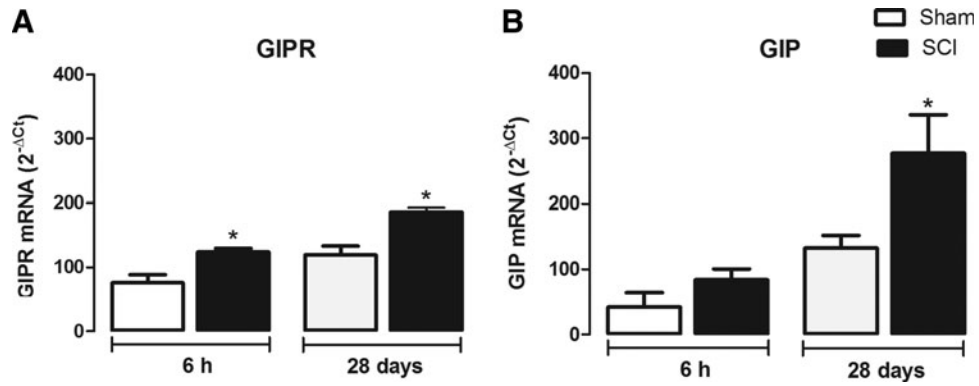

**SUPPLEMENTARY FIG. 3.** RT-PCR of spinal cord tissue of animals submitted to acute and chronic SCI. Total RNA was extracted from spinal cord tissue from injured or sham-operated rats, 6 h or 24 days after surgery. Levels of mRNA for GIPR and GIP were analyzed 6 h or 28 days after surgery. GAPDH mRNA was used to normalize the relative amounts of mRNA. Data are presented as mean  $\pm$  SEM of three to six mice per group and are representative of two independent experiments. \* $P \leq 0.05$  in Student's *t* test comparing SCI with corresponding sham-operated groups. GAPDH, glyceraldehyde-3-phosphate dehydrogenase; GIP, glucose-dependent insulinotropic peptide; GIPR, glucose-dependent insulinotropic peptide receptor; mRNA, messenger RNA; RNA, ribonucleic acid; RT-PCR, real-time polymerase chain reaction; SCI, spinal cord injury; SEM, standard error of mean.
